# Supplementary material for: Biodiversity and conservation of terricolous lichens and bryophytes in continental lowlands of northern Italy: the role of different dry habitat types
Source: Springer Nature journal article supplement (doi:10.1007/s10531-020-02034-1), 2020-08-18
Supplement: MOESM1 [file 18295304]

**Biodiversity and conservation of terricolous lichens and bryophytes in continental lowlands of northern Italy: the role of different dry habitat types**

Gabriele Gheza<sup>1,2</sup>, Silvia Assini<sup>1\*</sup>, Chiara Lelli<sup>2</sup>, Lorenzo Marini<sup>3</sup>, Helmut Mayrhofer<sup>4</sup>, Juri Nascimbene<sup>2</sup>

<sup>1</sup> Department of Earth and Environmental Sciences, University of Pavia, Via S. Epifanio 14, 27100 Pavia, Italy

<sup>2</sup> Department of Biological, Geological and Environmental Sciences, University of Bologna, Via Irnerio 42, 40126 Bologna, Italy

<sup>3</sup> DAFNAE Department, University of Padova, Viale dell'Università 16, 35020 Legnaro (PD), Italy

<sup>4</sup> Institute of Biology, Division of Plant Sciences, NAWI Graz, University of Graz, Holteigasse 6, 8010 Graz, Austria

\*corresponding author: silviapaola.assini@unipv.it

**Online Resource 1**

Locations of the study sites. Coordinates are given in the UTM WGS84 system.

|    | <b>Habitat</b>        | <b>Macroarea</b>                 | <b>Zone</b> | <b>E</b> | <b>N</b> | <b>N. of plots</b> |
|----|-----------------------|----------------------------------|-------------|----------|----------|--------------------|
| 1  | Heathlands            | “Vaude Canavesane”               | 32T         | 389528   | 5013511  | 7                  |
| 2  | Heathlands            | “Vaude Canavesane”               | 32T         | 398255   | 5009011  | 7                  |
| 3  | Heathlands            | “Baragge Biellesi-Vercellesi”    | 32T         | 433550   | 5042656  | 7                  |
| 4  | Heathlands            | “Baragge Biellesi-Vercellesi”    | 32T         | 434149   | 5043450  | 7                  |
| 5  | Heathlands            | “Baragge Biellesi-Vercellesi”    | 32T         | 432986   | 5041658  | 7                  |
| 6  | Heathlands            | “Baragge Biellesi-Vercellesi”    | 32T         | 436282   | 5037778  | 7                  |
| 7  | Heathlands            | “Baragge Biellesi-Vercellesi”    | 32T         | 431685   | 5036801  | 3                  |
| 8  | Heathlands            | “Baragge Biellesi-Vercellesi”    | 32T         | 441421   | 5045175  | 1                  |
| 9  | Heathlands            | “Baragge Biellesi-Vercellesi”    | 32T         | 443196   | 5044949  | 3                  |
| 10 | Heathlands            | “Baragge Biellesi-Vercellesi”    | 32T         | 449804   | 5046355  | 7                  |
| 11 | Heathlands            | “Baragge Biellesi-Vercellesi”    | 32T         | 448227   | 5049160  | 5                  |
| 12 | Heathlands            | “Baragge Biellesi-Vercellesi”    | 32T         | 454477   | 5054344  | 5                  |
| 13 | Heathlands            | “Baragge Biellesi-Vercellesi”    | 32T         | 449599   | 5031509  | 5                  |
| 14 | Heathlands            | “Groane Milanese”                | 32T         | 507615   | 5049882  | 5                  |
| 15 | Heathlands            | “Groane Milanese”                | 32T         | 507540   | 5049316  | 5                  |
| 16 | Heathlands            | “Groane Milanese”                | 32T         | 507820   | 5049118  | 5                  |
| 17 | Heathlands            | “Brughiere Lonatesi”             | 32T         | 473857   | 5055098  | 2                  |
| 18 | Heathlands            | “Brughiere Lonatesi”             | 32T         | 479468   | 5054042  | 7                  |
| 19 | Heathlands            | “Brughiere Lonatesi”             | 32T         | 478570   | 5050065  | 2                  |
| 20 | Heathlands            | “Brughiere Lonatesi”             | 32T         | 478260   | 5049364  | 7                  |
| 21 | Heathlands            | “Brughiere Lonatesi”             | 32T         | 479093   | 5046600  | 5                  |
| 22 | Heathlands            | “Brughiere Lonatesi”             | 32T         | 478660   | 5046393  | 5                  |
| 23 | Acidic dry grasslands | “Sesia river”                    | 32T         | 452895   | 5034279  | 1                  |
| 24 | Acidic dry grasslands | “Sesia river”                    | 32T         | 452766   | 5034182  | 3                  |
| 25 | Acidic dry grasslands | “Sesia river”                    | 32T         | 452839   | 5033777  | 5                  |
| 26 | Acidic dry grasslands | “Sesia river”                    | 32T         | 452867   | 5032982  | 1                  |
| 27 | Acidic dry grasslands | “Sesia river”                    | 32T         | 452783   | 5032840  | 3                  |
| 28 | Acidic dry grasslands | “Sesia river”                    | 32T         | 452706   | 5030797  | 1                  |
| 29 | Acidic dry grasslands | “Sesia river”                    | 32T         | 453021   | 5026751  | 3                  |
| 30 | Acidic dry grasslands | “Inland sand dunes of Lomellina” | 32T         | 484706   | 5008739  | 5                  |
| 31 | Acidic dry grasslands | “Inland sand dunes of Lomellina” | 32T         | 484507   | 5008776  | 5                  |
| 32 | Acidic dry grasslands | “Inland sand dunes of Lomellina” | 32T         | 483151   | 5004835  | 2                  |
| 33 | Acidic dry grasslands | “Inland sand dunes of Lomellina” | 32T         | 483144   | 5004657  | 1                  |
| 34 | Acidic dry grasslands | “Inland sand dunes of Lomellina” | 32T         | 483345   | 5004440  | 5                  |
| 35 | Acidic dry grasslands | “Ticino river”                   | 32T         | 475612   | 5053744  | 5                  |
| 36 | Acidic dry grasslands | “Ticino river”                   | 32T         | 475008   | 5053482  | 2                  |
| 37 | Acidic dry grasslands | “Ticino river”                   | 32T         | 473950   | 5052548  | 5                  |
| 38 | Acidic dry grasslands | “Ticino river”                   | 32T         | 474019   | 5052642  | 2                  |
| 39 | Acidic dry grasslands | “Ticino river”                   | 32T         | 474881   | 5051829  | 2                  |
| 40 | Acidic dry grasslands | “Ticino river”                   | 32T         | 475073   | 5051290  | 5                  |
| 41 | Acidic dry grasslands | “Ticino river”                   | 32T         | 479374   | 5046346  | 7                  |
| 42 | Acidic dry grasslands | “Ticino river”                   | 32T         | 479188   | 5046476  | 1                  |
| 43 | Acidic dry grasslands | “Ticino river”                   | 32T         | 479108   | 5046486  | 1                  |
| 44 | Acidic dry grasslands | “Ticino river”                   | 32T         | 479455   | 5046066  | 1                  |
| 45 | Acidic dry grasslands | “Ticino river”                   | 32T         | 476841   | 5044560  | 2                  |
| 46 | Acidic dry grasslands | “Ticino river”                   | 32T         | 476834   | 5044461  | 1                  |
| 47 | Acidic dry grasslands | “Ticino river”                   | 32T         | 476681   | 5044326  | 5                  |
| 48 | Acidic dry grasslands | “Ticino river”                   | 32T         | 484037   | 5035075  | 2                  |

|    |                           |                |     |        |         |   |
|----|---------------------------|----------------|-----|--------|---------|---|
| 49 | Acidic dry grasslands     | “Ticino river” | 32T | 484754 | 5031714 | 3 |
| 50 | Acidic dry grasslands     | “Ticino river” | 32T | 485759 | 5031336 | 1 |
| 51 | Acidic dry grasslands     | “Ticino river” | 32T | 485986 | 5031205 | 2 |
| 52 | Acidic dry grasslands     | “Ticino river” | 32T | 486362 | 5030720 | 7 |
| 53 | Acidic dry grasslands     | “Ticino river” | 32T | 487073 | 5027447 | 5 |
| 54 | Acidic dry grasslands     | “Ticino river” | 32T | 495134 | 5014642 | 2 |
| 55 | Acidic dry grasslands     | “Ticino river” | 32T | 495946 | 5013853 | 2 |
| 56 | Acidic dry grasslands     | “Ticino river” | 32T | 495781 | 5013943 | 1 |
| 57 | Acidic dry grasslands     | “Ticino river” | 32T | 495886 | 5013401 | 1 |
| 58 | Acidic dry grasslands     | “Ticino river” | 32T | 494899 | 5013836 | 5 |
| 59 | Acidic dry grasslands     | “Ticino river” | 32T | 506263 | 5004502 | 5 |
| 60 | Acidic dry grasslands     | “Po river”     | 32T | 468392 | 4996011 | 5 |
| 61 | Acidic dry grasslands     | “Po river”     | 32T | 467060 | 4998404 | 5 |
| 62 | Calcareous dry grasslands | “Po river”     | 32T | 471692 | 4987098 | 2 |
| 63 | Calcareous dry grasslands | “Po river”     | 32T | 471814 | 4962718 | 7 |
| 64 | Calcareous dry grasslands | “Scrvia river” | 32T | 489827 | 4978461 | 7 |
| 65 | Calcareous dry grasslands | “Scrvia river” | 32T | 487289 | 4963678 | 5 |
| 66 | Calcareous dry grasslands | “Scrvia river” | 32T | 488531 | 4959904 | 2 |
| 67 | Calcareous dry grasslands | “Scrvia river” | 32T | 488503 | 4959822 | 2 |
| 68 | Calcareous dry grasslands | “Scrvia river” | 32T | 488560 | 4959846 | 1 |
| 69 | Calcareous dry grasslands | “Scrvia river” | 32T | 488362 | 4960070 | 1 |
| 70 | Calcareous dry grasslands | “Scrvia river” | 32T | 488370 | 4959326 | 5 |
| 71 | Calcareous dry grasslands | “Serio river”  | 32T | 557697 | 5051083 | 7 |
| 72 | Calcareous dry grasslands | “Serio river”  | 32T | 557794 | 5050611 | 3 |
| 73 | Calcareous dry grasslands | “Serio river”  | 32T | 558053 | 5052409 | 1 |
| 74 | Calcareous dry grasslands | “Serio river”  | 32T | 558030 | 5051829 | 7 |
| 75 | Calcareous dry grasslands | “Serio river”  | 32T | 558088 | 5051184 | 5 |
