# Supplementary material for: Biodiversity and conservation of terricolous lichens and bryophytes in continental lowlands of northern Italy: the role of different dry habitat types
Source: Springer Nature journal article supplement (doi:10.1007/s10531-020-02034-1), 2020-08-18
Supplement: MOESM2 [file 18295304]

**Biodiversity and conservation of terricolous lichens and bryophytes in continental lowlands of northern Italy: the role of different dry habitat types**

Gabriele Gheza<sup>1,2</sup>, Silvia Assini<sup>1\*</sup>, Chiara Lelli<sup>2</sup>, Lorenzo Marini<sup>3</sup>, Helmut Mayrhofer<sup>4</sup>, Juri Nascimbene<sup>2</sup>

<sup>1</sup> Department of Earth and Environmental Sciences, University of Pavia, Via S. Epifanio 14, 27100 Pavia, Italy

<sup>2</sup> Department of Biological, Geological and Environmental Sciences, University of Bologna, Via Irnerio 42, 40126 Bologna, Italy

<sup>3</sup> DAFNAE Department, University of Padova, Viale dell'Università 16, 35020 Legnaro (PD), Italy

<sup>4</sup> Institute of Biology, Division of Plant Sciences, NAWI Graz, University of Graz, Holteigasse 6, 8010 Graz, Austria

\*corresponding author: silviapaola.assini@unipv.it

**Online Resource 2**

Variables included in the formulation of GLMMs and PERMANOVA.

The formulation of the GLMMs included the following variables:

Species richness in heathlands ~ % cover of therophytes + % cover of hemicryptophytes + % cover of phanerophytes + pH + annual precipitation + mean annual temperature.

Species richness in acidic dry grasslands ~ % cover of therophytes + % cover of hemicryptophytes + % cover of phanerophytes + pH + mean annual temperature + % cover of the shrub layer.

Species richness in calcareous dry grasslands ~ % cover of therophytes + % cover of hemicryptophytes + % cover of phanerophytes + pH + annual precipitation + % cover of the herb layer.

The formulation of the PERMANOVA included the following variables:

Species assemblage in heathlands ~ % cover of therophytes + % cover of hemicryptophytes + % cover of phanerophytes + pH + annual precipitation + mean annual temperature.

Species assemblage in acidic dry grasslands ~ % cover of therophytes + % cover of hemicryptophytes + % cover of phanerophytes + pH + mean annual temperature + % cover of the shrub layer.

Species assemblage in calcareous dry grasslands ~ % cover of therophytes + % cover of hemicryptophytes + % cover of phanerophytes + pH + annual precipitation + % cover of the herb layer.
